# Supplementary material for: Dietary supplementation with n-3 fatty acids from weaning limits brain biochemistry and behavioural changes elicited by prenatal exposure to maternal inflammation in the mouse model
Source: PubMed Central journal article supplement (PMC5068805; doi:10.1038/tp.2015.126), 2015-09-22
Supplement: tp2015126x1.pdf [file tp2015126x1.pdf]

**Supplementary Table 1. Summary of the MRS metabolites in adulthood in MIA mice with or without *n*-3 PUFA interventions in peri-adolescence**

| Groups | MRS Metabolites |             |             |             |             |
|--------|-----------------|-------------|-------------|-------------|-------------|
|        | Cho/Cr          | Glx/Cr      | Gly/Cr      | Lac/Cr      | Tau/Cr      |
| n6-SAL | 0.18 ± 0.04     | 1.21 ± 0.09 | 0.87 ± 0.15 | 0.42 ± 0.08 | 1.92 ± 0.05 |
| n6-POL | 0.20 ± 0.03     | 1.11 ± 0.07 | 0.53 ± 0.10 | 0.41 ± 0.07 | 1.71 ± 0.14 |
| n3-SAL | 0.13 ± 0.02     | 1.09 ± 0.11 | 0.59 ± 0.07 | 0.35 ± 0.05 | 1.78 ± 0.10 |
| n3-POL | 0.13 ± 0.02     | 1.19 ± 0.07 | 0.66 ± 0.10 | 0.26 ± 0.04 | 1.90 ± 0.07 |

All values are means ± SEM. Groups: n6-SAL: Prenatal saline-exposed offspring treated with n6-polyunsaturated fatty acids (n-6 PUFA) control diet; n6-POL: Prenatal PolyI:C-exposed offspring treated with n-6 PUFA; n3-SAL: Prenatal saline-exposed offspring treated with n-3 PUFA; n3-POL: Prenatal PolyI:C-exposed offspring treated with n-3 PUFA. Cho: choline; Cr: creatine; GLX: glutamate + glutamine; Gly: glycine; Lac: lactatae; Tau: taurine.
